1 **Detection of AmpC  $\beta$ -lactamases in *Escherichia coli* using different screening**

2 **agars**

3

4 Evert den Drijver <sup>1,2\*</sup>, Jaco J. Verweij <sup>2</sup>, Carlo Verhulst <sup>1</sup>, Joke Soer <sup>1,3</sup>, Kees Veldman <sup>4</sup>, John W.

5 Rossen <sup>5</sup>, A.M.D. (Mirjam) Kooistra-Smid <sup>5,6</sup>, Marjolein F. Q. Kluytmans - van den Bergh <sup>1,7,8</sup>, Jan A.

6 J. W. Kluytmans <sup>1,2,8</sup>

7 1 Laboratory for Microbiology and Infection Control, Amphia Hospital, Breda, The Netherlands

8 2 Laboratory for Medical Microbiology and Immunology, Elisabeth-TweeSteden Hospital, Tilburg, The

9 Netherlands

10 3 Avans Academy for Technology of Health & Environment, AVANS University of Applied Sciences, Breda,

11 The Netherlands

12 4 Central Veterinary Institute part of Wageningen UR, Lelystad, The Netherlands

13 5. University of Groningen, University Medical Center Groningen, Department of Medical Microbiology and

14 Infection Prevention, Groningen, The Netherlands

15 6 Certe, Department of Medical Microbiology, Groningen, The Netherlands

16 7 Amphia Academy Infectious Disease Foundation, Amphia Hospital, Breda, The Netherlands

17 8 Julius Center for Health Sciences and Primary Care, UMC Utrecht, Utrecht University, the Netherlands

18 \* Corresponding author Evert den Drijver

19 Laboratory for Medical Microbiology and Immunology, ElisabethTweesteden Hospital

20 Postbus 747, 5000 AS Tilburg

21 The Netherlands

22 E-mail: [e.dendrijver@etz.nl](mailto:e.dendrijver@etz.nl)

## 23 Abstract

24  
25 The aim of this study was to determine the performance of both cefotaxime and ceftazidime  
26 containing agars on the specificity and sensitivity for chromosomal AmpC-hyperproducing and  
27 plasmid AmpC harboring *Escherichia coli* compared to ESBL-producing *E. coli* and *E. coli* without  
28 ESBL, pAmpC or cAmpC hyperproduction. Second, we evaluated the influence of adding  
29 cefoxitin to these agars for detection of both chromosomal AmpC-hyperproducing and plasmid  
30 AmpC harboring *E. coli*.

31 Four different homemade screening agars with cefotaxime (1mg/L), ceftazidime (1mg/L),  
32 cefotaxime (1mg/L) with cefoxitin (8mg/L), and ceftazidime (1mg/L) with cefoxitin (8mg/L) were  
33 compared to each other for the identification of AmpC producing *E. coli*. A total of 40 isolates  
34 with plasmid encoded AmpC  $\beta$ -lactamases, 40 isolates with alterations in the  
35 promoter/attenuator region of the AmpC gene leading to hyperproduction of the  $\beta$ -lactamase,  
36 40 isolates with ESBL genes and 39 isolates lacking both a AmpC and ESBL genotype were used  
37 to test the four agars.

38 The sensitivity and specificity were 100% (95% confidence interval (95% CI) 96.1% to 100%) and  
39 48.1% (95% CI 38.6%-60.2%), respectively, for the cefotaxime agar; 100% (95% CI 96.1% to  
40 100%) and 49.41% (95% CI 39.8%-61.4%), respectively, for the ceftazidime agar; 96.3% (95% CI  
41 89.1% to 99.2%) and 77.2% (95% CI 66.7%-85.2%) respectively, for the cefotaxime with cefoxitin  
42 agar; 98.8% (95% CI) 92.6% to 99.6%) and 81.0% (95% CI 70.9%-88.3%) respectively, for the  
43 ceftazidime agar with cefoxitin. The main reason for false-positive results were ESBL-harboring  
44 strains that grew on various agars; therefore, the specificity of each agar reported here was

45 influenced mainly by the proportion of ESBL isolates tested. In conclusion addition of cefoxitin  
46 to cefotaxime and ceftazidime containing agars had little influence on sensitivity, but increased  
47 specificity for the detection of AmpC in *E. coli*.

48

## 49 Introduction

50

51 Over the past decades, the importance of resistant Enterobacteriales increased substantially  
52 due to the emergence of various resistance traits that inactivate most  $\beta$ -lactam antibiotics. In  
53 *Escherichia coli*, resistance to 2<sup>nd</sup> and 3<sup>rd</sup> generation cephalosporins is most frequently due to  
54 the occurrence of plasmid-encoded ESBL, as well as both plasmid-encoded (*pampC*) and  
55 chromosomally-encoded (*campC*) AmpC genes. As the rapid and accurate detection of resistant  
56 bacteria is crucial for treatment and control, selective media for detection of extended-  
57 spectrum  $\beta$ -lactamase-producing Enterobacteriales (ESBL-E) have been developed. A  
58 considerable number of studies were published on the performance of ESBL-E (1–5) screening  
59 agars. So far, few studies have focused on screening media for AmpC  $\beta$ -lactamase-producing  
60 Enterobacteriales (AmpC-E).

61 The basis of most agars that are selective for ESBL is a adding a 3<sup>rd</sup> generation cephalosporin,  
62 e.g. cefotaxime or ceftazidime. Some ESBL-E screening agars use AmpC inhibitors, such as  
63 cloxacillin (3–5) to suppress Enterobacteriales that intrinsically produce AmpC  $\beta$ -lactamase on  
64 high level (e.g. *Enterobacter* spp). Overgrowth of such species with intrinsic AmpC  $\beta$ -lactamase  
65 hyperproduction makes it more difficult to screen for *E. coli* with acquired  $\beta$ -lactamases, which

66 may lead to a lower sensitivity of the ESBL-E screening agars(3). *E. coli* isolates produce  
67 chromosomally encoded AmpC (cAmpC) constitutively, but only on a low level. However, they  
68 may acquire alterations in the promoter/attenuator region leading to hyperproduction of  
69 cAmpC  $\beta$ -lactamase (6,7). Growth of both cAmpC and pAmpC producing Enterobacteriales is  
70 inhibited by cloxacillin. Cloxacillin containing agars may improve the yield of ESBL producing *E.*  
71 *coli* but they lead to a lower yield of both pAmpC and cAmpC  $\beta$ -lactamase producing *E. coli*. One  
72 option to solve this problem could be to include an additional agar specifically developed for  
73 AmpC producing *E. coli* during screening.

74  
75 According to the EUCAST guidelines combined resistance to 3<sup>rd</sup> generation cephalosporins and  
76 ceftazidime, a cephamycin antibiotic, may be used as phenotypic criteria for AmpC screening (8).  
77 Ceftazidime is highly active against ESBL producing bacteria (9), but has little activity against most  
78 AmpC producing bacteria (10). This makes ceftazidime useful in screening strategies for AmpC (11–  
79 13). A study by Reuland *et al* compared three different screening strategies of pAmpC  
80 Enterobacteriales (14) based on susceptibility patterns. These included: reduced susceptibility to  
81 ceftazidime and/or ceftazidime (>1 mg/L), reduced susceptibility to ceftazidime (> 8mg/L), or a  
82 combination of ceftazidime and/or ceftazidime (>1 mg/L). Using just ceftazidime during a screening  
83 resulted in high sensitivity (97%), but was not specific for AmpC (72%) as a porin deficiency can  
84 cause ceftazidime resistance as well. Combining reduced ceftazidime and/or ceftazidime  
85 susceptibility with reduced ceftazidime susceptibility increased the specificity to 90%, without  
86 significant loss of sensitivity (97%). Reuland *et al.* did not use a screening agar to differentiate  
87 pAmpC Enterobacteriales. We hypothesize that an agar which combines ceftazidime with either

88 cefotaxime or ceftazidime may result in an AmpC specific screening agar, which could be of  
89 additional value to the use of an ESBL-agar with cloxacillin.

90

91 The first aim of this study was to determine the performance of both cefotaxime and  
92 ceftazidime containing agars on the specificity and sensitivity for AmpC-producing *E. coli*  
93 compared to ESBL-producing and AmpC/ESBL negative *E. coli*. Second, we evaluated the  
94 influence of adding ceftoxitin to these agars for detection of AmpC producing *E. coli*.

95

## 96 Methods

97

### 98 Collection of isolates

99 A panel of 159 *E. coli* isolates was used for the evaluation of the AmpC screening agar. This  
100 panel consisted of 40 *E. coli* isolates harboring pAmpC, 40 *E. coli* isolates with cAmpC mutations  
101 known to lead to hyperproduction (referred in this study as “cAmpC positive”), 40 ESBL-  
102 producing *E. coli* isolates and 39 *E. coli* without signs of ESBL, pAmpC or cAmpC  
103 hyperproduction based on genotype (referred in this study as “AmpC/ESBL negative”). The ESBL-  
104 producing *E. coli* and AmpC/ESBL negative *E. coli* isolates were confirmed to lack any known  
105 alterations in the promoter/attenuator region of the AmpC gene leading to hyperproduction of  
106 the  $\beta$ -lactamase, as reported by Tracz *et al* (7). Isolates were recovered at different study sites  
107 or from various clinical specimens, and were isolated from humans (n=141) and animals (n=18)

108 (15–20). More detailed information on the recovery of the isolates is described in the additional  
109 file 1. Additional file 2 shows an overview of all strains.

110

## 111 Evaluation of AmpC agars

112 MacConkey agar no3 medium was obtained from Oxoid Limited (ThermoFisher, Basingstoke,  
113 Hampshire, United Kingdom). Both cefotaxime sodium salt and ceftazidime sodium salt were  
114 obtained from VWR International (Radnor, Pennsylvania, USA). Cefoxitin sodium salt was  
115 obtained from Sigma-Aldrich (Poole, Dorset, UK). MacConkey agar no3 was used as the basal  
116 medium to which different dilutions of antibiotics were added. Four different concentration  
117 combination were evaluated; 1. cefotaxime 1mg/L agar, 2. ceftazidime 1 mg/L agar, 3.  
118 cefotaxime 1mg/L with cefoxitin 8mg/L agar, and 4. ceftazidime 1 mg/L with cefoxitin 8mg/L  
119 agar.

120

121 All strains with AmpC or ESBL were cultured in a selective enrichment broth consisting of a TSB  
122 containing 0, 25 mg/L cefotaxime and 8mg/L vancomycin (TSB-VC, Mediaproducts, Groningen,  
123 The Netherlands). For strains without AmpC or ESBL a brain heart infusion broth was used (BHI,  
124 Mediaproducts, Groningen, The Netherlands), as using selective enrichment broth might inhibit  
125 growth. After overnight aerobic incubation for 18-24 hours (35°-37°), 10 µl of the broth was  
126 subcultured on the four different AmpC agars. Agars were incubated aerobically for 18-24 hours  
127 (35°-37°). Results were interpreted as growth or no growth.

128

## 129 **Statistical analysis**

130 Data were analyzed with Statistical Package for Social Science software (SPSS; IBM Corp.,  
131 Armonk, New York, US; version 22). For sensitivity all strains positive for an acquired AmpC gene  
132 or alterations in promoter/attenuator AmpC related to hyperproduction were considered true  
133 positives. For specificity were all strains negative for an acquired AmpC gene and alterations in  
134 promoter/attenuator AmpC related to hyperproduction were considered true negatives.  
135 Confidence intervals (95% CI) were calculated according to the adjusted Wald method.

136

137 The prevalence of ESBL in the panel of isolates was 25.16% (40 out of 159 isolates), due to the  
138 artificial nature of the collection set up. To analyse the influence of variations in ESBL  
139 prevalence on the specificity of both the cefotaxime 1mg/L + ceftazidime 1mg/L and the  
140 ceftazidime 1mg/L + ceftazidime 1mg/L agar, we remodelled our data for an ESBL prevalence range  
141 from 0 to 99%.

142

143 Specificity of the cefotaxime 1mg/L + ceftazidime 1mg/L agar was calculated using following  
144 formula:  $38 + (23/40 \times \text{number of ESBL isolates}) / (38 + (23/40 \times \text{number of ESBL isolates}) + (1 +$   
145  $17/40 \times \text{number of ESBL isolates}))$ .

146

147 Specificity of the ceftazidime 1mg/L + ceftazidime 1mg/L agar was calculated using following  
148 formula:  $39 + (25/40 \times \text{number of ESBL isolates}) / (39 + (25/40 \times \text{number of ESBL isolates}) +$   
149  $(15/40 \times \text{number of ESBL isolates}))$ .

150

151 Prevalence of ESBL was calculated using the formula: number of ESBL isolates / (119 + number  
152 of ESBL isolates).

153

## 154 Results

155

156 The 159 *E. coli* isolates were evaluated for growth on the four different selective agar plates as  
157 shown in Table 1. Isolates hyperproducing cAmpC or producing pAmpC or ESBL *E. coli* grew on  
158 both cefotaxime and ceftazidime agar plates without cefoxitin. Of the AmpC/ESBL negative  
159 isolates, only one (2.6%) isolate grew on the cefotaxime agar. No growth of AmpC/ESBL negative  
160 isolates was seen on the ceftazidime agar.

161 The cefotaxime + cefoxitin agar showed growth of 39 (97.5%) pAmpC isolates, 39 (97.5%)  
162 cAmpC isolates, 17 (42.5%) ESBL isolates and one (2.6%) AmpC/ESBL negative isolate. The  
163 ceftazidime + cefoxitin agar showed growth of 39 (97.5%) pAmpC isolates, 40 (100%) cAmpC  
164 isolates, 15 (37.5%) ESBL isolates and none of the AmpC/ESBL negative isolates. In both agars  
165 the pAmpC isolate that did not grow was the same and appeared to contain a *bla<sub>ACC</sub>* gene. The  
166 ATCC control *E. coli* strain did not grow on any of the evaluated agars.

167

168 Table 2 and 3 present the sensitivity and specificity values. Although the agars containing  
169 cefoxitin showed a slightly lower sensitivity than the agars without cefoxitin, all confidence  
170 intervals overlapped. Specificity was assessed for the 79 AmpC-negative isolates. The agars



171 containing cefoxitin showed a better specificity than the agars without cefoxitin. The specificity  
172 of the cefotaxime 1mg/L + cefoxitin 8mg/L and ceftazidime 1mg/L + cefoxitin 8mg/L agar plates  
173 were similar, based upon overlap of confidence intervals.

174  
175 As described above, we found that ESBL isolates had the largest impact on specificity, since  
176 ~40% of them grew on the cefotaxime+cefoxitin or ceftazidime+cefoxitin agars. The prevalence  
177 of ESBL in the isolates tested was 25.16%, due to the artificial nature of the isolates chosen. Figs  
178 1 and 2 show the relation between specificity of the cefotaxime 1mg/L + cefoxitin 8mg/L and of  
179 the ceftazidime 1mg/L + cefoxitin 8mg/L agar plotted versus ESBL prevalence. An increase in  
180 ESBL prevalence in the isolate collection would decrease specificity in a nonlinear function.  
181 According to our model a low ESBL prevalence e.g. 5% would lead to a specificity of the  
182 cefotaxime 1mg/L + cefoxitin 8mg/L agar of 92% and of the ceftazidime 1mg/L + cefoxitin 8mg/L  
183 agar of 95%. A high prevalence of e.g. 50% would decrease specificity of the cefotaxime 1mg/L +  
184 cefoxitin 8mg/L agar to 67% and of the ceftazidime 1mg/L + cefoxitin 8mg/L agar to 72%.

185

## 186 Discussion

187

188 Four different screening agars were evaluated on their ability to identify AmpC producing *E. coli*.  
189 Cefotaxime- and ceftazidime containing agar showed similar results in sensitivity and specificity  
190 for AmpC detection in the tested panel of *E. coli* isolates. The addition of cefoxitin increased  
191 specificity for AmpC detection, but did not influence sensitivity.

192  
193 Although there are no studies on AmpC selective agars, these results are in line with studies  
194 showing that ceftazidime might be a useful screening additive for AmpC production(11–13).  
195 Polsfuss *et al* analyzed the use of ceftazidime disc diffusion compared to ceftazidime for different  
196 Enterobacteriales (13). The study included 211 potential AmpC producers based on the basis of  
197 ceftazidime inhibition zone diameters of  $\leq 18$  mm, ceftazidime inhibition zone diameters of  $\leq 16$  mm,  
198 and/or positive ESBL screening diameters according to CLSI guidelines. The potential AmpC  
199 producers were compared to 94 isolates that tested negative in the three mentioned screening  
200 criteria. All isolates were subjected to an AmpC multiplex PCR and promoter/attenuator regions  
201 of *E. coli* isolates were sequenced. The detection of a pAmpC gene and/or known  
202 promoter/attenuator mutations leading to AmpC hyperproduction were considered as gold  
203 standard. The majority of acquired AmpC  $\beta$ -lactamases were of the CMY-group and DHA-group,  
204 none of the strains possessed  $\beta$ -lactamases of the ACC, FOX, MOX or ACT/MIR groups. Ceftazidime  
205 showed a sensitivity of 97,4% and a specificity of 78,7%. The use of ceftazidime, another type of  
206 cephalosporin, was tested as well, but although this method showed a better specificity (99,3%),  
207 sensitivity was much lower (52,6%).

208 As already described, Reuland *et al* compared different screening methods based upon reduced  
209 3rd generation cephalosporin susceptibility for plasmid-encoded AmpC in Enterobacteriales  
210 (14). The study collection consisted out of 356 Enterobacteriales resistant to a third generation  
211 cephalosporins (cefotaxime and/or ceftazidime) and/or ceftazidime, of which 68.8% was  
212 determined as *E. coli*. A total of 34 pAmpC containing isolates (28 *E. coli*) were detected

213 containing genes from the CMY-group n=29 ; DHA-group n=4 and ACC-group n=1. No analysis on  
214 chromosomal AmpC hyperproducers was performed. The strategy using reduced susceptibility  
215 to cefotaxime and/or ceftazidime together with reduced susceptibility to ceftazidime showed a  
216 sensitivity of 97% and a specificity of 90%. The only isolate not detected contained an ACC-gene.

217  
218 In our study one isolate containing a ACC-gene did not grow on the ceftazidime containing agars.  
219 Although most acquired AmpC  $\beta$ -lactamases are inhibited by cephamycines, the ACC-group  
220 remains an exception (10). This  $\beta$ -lactamase seems to be less common as CMY-group AmpC  $\beta$ -  
221 lactamases. Nevertheless, ACC-type enzymes have been detected in several countries in Europe  
222 (21–23). Outbreaks have been reported as well (24). The use of ceftazidime containing agars may  
223 have limitations in areas where the ACC-group is prevalent.

224  
225 Clearly, there are more limitations in the present study. First, this study is an analytical  
226 exploration of sensitivity and specificity based upon retrospectively selected strains. Although  
227 the panel of strains was selected on genotype, all strains were obtained from clinical or study  
228 collections in which different culture screening criteria were used. We tried to minimize  
229 selection bias based upon our screening criteria, but the distribution of our collection may not  
230 be completely comparable to a clinical setting. The use of mainly CMY-group pAmpC isolates  
231 may have led to overestimation of sensitivity in some degree. However, the CMY-group seems  
232 to be the predominant *pampC* gene in clinical settings, and the ceftazidime containing agars may  
233 be therefor applicable in these setting for e.g. screening of AmpC rectal carriage.

234

235 We remodeled specificity for the cefotaxime 1mg/L + ceftazidime 1mg/L +  
236 ceftazidime 1mg/L + ceftazidime 1mg/L + ceftazidime 1mg/L + ceftazidime 1mg/L +  
237 ceftazidime 1mg/L + ceftazidime 1mg/L + ceftazidime 1mg/L + ceftazidime 1mg/L +  
238 ceftazidime 1mg/L + ceftazidime 1mg/L + ceftazidime 1mg/L + ceftazidime 1mg/L +  
239 ceftazidime 1mg/L + ceftazidime 1mg/L + ceftazidime 1mg/L + ceftazidime 1mg/L +  
240 ceftazidime 1mg/L + ceftazidime 1mg/L + ceftazidime 1mg/L + ceftazidime 1mg/L +  
241 ceftazidime 1mg/L + ceftazidime 1mg/L + ceftazidime 1mg/L + ceftazidime 1mg/L +  
242 ceftazidime 1mg/L + ceftazidime 1mg/L + ceftazidime 1mg/L + ceftazidime 1mg/L +  
243 ceftazidime 1mg/L + ceftazidime 1mg/L + ceftazidime 1mg/L + ceftazidime 1mg/L +  
244 ceftazidime 1mg/L + ceftazidime 1mg/L + ceftazidime 1mg/L + ceftazidime 1mg/L +

245 Our study was performed using strains cultured in semi-selective pre-enrichment broth. This  
246 pre-enrichment step was included to mimic our laboratory algorithm for screening of  
247 multiresistant Enterobacteriales in rectal samples. Former studies on the screening of third  
248 generation cephalosporin resistance have shown that a pre-enrichment strategy results in  
249 higher yield compared to direct plating (28–30). We assume that that the use of a pre-  
250 enrichment strategy in clinical setting will result in a similar detection range, though inoculum  
251 of the original sample may differ. A limit of detection is difficult to obtain, as it is not well known  
252 which load in clinical samples is comparable to an *in vitro* setting. Our strategy using the  
253 combination of pre-enrichment and selective screening agars was applied in a prevalence study  
254 on AmpC in the Amphia hospital (16). Yield of AmpC *E. coli* was comparable to other Dutch  
255 prevalence studies (31,32). However, a more elaborate evaluation of clinical samples is needed  
256 to confirm our results on sensitivity and specificity of our screening strategy.

257  
258 In this study the use of screening agars was only assessed on *E. coli*, as this is one of the most  
259 prevalent Enterobacteriales with acquired  $\beta$ -lactamase genes. We expect the agar to be useful  
260 for other AmpC producing Enterobacteriales, however sensitivity and specificity for other  
261 species may differ. For example, *K. pneumoniae* without pAmpCs can be ceftaxime-resistant due  
262 to loss of porin expression (33). Furthermore, not all existing  $\beta$ -lactamase groups were included.  
263 No *E. coli* isolates containing AmpC *bla*<sub>FOX</sub> and *bla*<sub>ACT/MIR</sub> groups nor the ESBL *bla*<sub>SHV</sub> and *bla*<sub>TEM</sub> or  
264 other ESBL groups nor carbapenemases were tested. Co-expression of AmpC and ESBL in *E. coli*  
265 isolates lacked as well. Although, *bla*<sub>CTX-M</sub>, *bla*<sub>CMY</sub> and *bla*<sub>DHA</sub> seem to be most prevalent in the  
266 European setting(10,34), future analysis is needed to see if results are applicable to other  
267 Enterobacteriales,  $\beta$ -lactamase gene groups and  $\beta$ -lactamase gene combinations as well.

268  
269 The AmpC screening agars are not able to differentiate pAmpC vs cAmpC in *E. coli*. Both  
270 mechanisms cause elevated 3<sup>rd</sup> generation cephalosporin MICs, and MIC distributions of cAmpC  
271 and pAmpC tend to overlap (35,36). This makes it difficult to create a specific pAmpC or cAmpC  
272 screening agar. EUCAST guidelines advise a PCR to distinguish both mechanisms. A screening  
273 agar on AmpC may limit the amount strains for molecular confirmation.

274  
275 **Conclusions**

276 Cefotaxime or ceftazidime had a similar sensitivity and specificity for AmpC in screenings agar in  
277 our isolate panel. Addition of ceftaxime to create a more AmpC selective agar had little influence  
278 on sensitivity, but increased specificity. Our results apply mainly for *bla*<sub>CMY-type</sub> producing *E. coli*

279 and further studies are needed to evaluate an agar containing cefotaxime or ceftazidime with  
280 cefoxitin in a clinical setting. We expect the screening agars to be feasible to screen for AmpC  
281 rectal carriage, when using pre-enrichment similar to current ESBL screening agar strategies. So,  
282 agars containing cefotaxime or ceftazidime with cefoxitin do not seem to be inferior in  
283 sensitivity compared to agars without cefoxitin, and may be promising when used additional to  
284 e.g. a ESBL specific screenings agar for screening of 3<sup>rd</sup> generation cephalosporin resistance in *E.*  
285 *coli*.

286

## 287 **Abbreviations**

288 ESBL: Extended-spectrum beta-lactamase    ESBL-E Extended-spectrum beta-lactamase  
289 producing Enterobacteriales    pAmpC: plasmid-encoded AmpC    cAmpC: chromosomally-  
290 encoded AmpC    AmpC-E: AmpC producing Enterobacteriales

291

## 292 **Declarations**

## 293 **Acknowledgments**

294 The authors thank the laboratory technicians from the laboratory for Microbiology and Infection  
295 Control of the Amphia Hospital, the Central Veterinary Institute, the Department of Medical  
296 Microbiology, University Medical Center Groningen and the Department of Medical  
297 Microbiology, Certe involved in the setup of the strain collection.

## 298 Funding

299 This research did not receive any specific grant from funding agencies.

300

## 301 Competing interests

302 The authors declare no competing interests.

## 303 Authors' contributions

304 E.D. and J.A.J.W.K. conceived of and designed the study ; J.S. and C.V. were responsible for  
305 laboratory processing of the isolates ; J.J.V. conducted molecular analysis of local strains ; K.V.,  
306 J.W.R., A.M.D.K.S., and M.F.Q.K. provided isolates for the strain collection and revised and  
307 approved the manuscript. E.D. performed the analyses and wrote the first draft of the  
308 manuscript with input from J.A.J.W.K. All authors contributed to preparation of the final  
309 manuscript.

310

## 311 References

312

- 313 1. Glupczynski Y, Berhin C, Bauraing C, Bogaerts P. Evaluation of a new selective  
314 chromogenic agar medium for detection of extended-spectrum  $\beta$ -lactamase-producing  
315 Enterobacteriaceae. *J Clin Microbiol.* 2007;45(2):501–5.
- 316 2. Réglier-Poupet H, Naas T, Carrer A, Cady A, Adam JM, Fortineau N, et al. Performance of  
317 chromID ESBL, a chromogenic medium for detection of Enterobacteriaceae producing

- 318 extended-spectrum  $\beta$ -lactamases. *J Med Microbiol.* 2008;57(3):310–5.
- 319 3. Randall LP, Kirchner M, Teale CJ, Coldham NG, Liebana E, Clifton-hadley F. Evaluation of  
320 CHROMagar CTX, a novel medium for isolating CTX-M-ESBL-positive Enterobacteriaceae  
321 while inhibiting AmpC-producing strains. *J Antimicrob Chemother.* 2009;63(2):302–8.
- 322 4. Al Naiemi N, Murk JL, Savelkoul PHM, Vandenbroucke-Grauls CMJ, Debets-Ossenkopp YJ.  
323 Extended-spectrum beta-lactamases screening agar with AmpC inhibition. *Eur J Clin*  
324 *Microbiol Infect Dis.* 2009;28(8):989–90.
- 325 5. Overdevest ITMA, Willemsen I, Elberts S, Verhulst C, Kluytmans JAJW. Laboratory  
326 detection of extended-spectrum-beta-lactamase-producing Enterobacteriaceae:  
327 Evaluation of two screening agar plates and two confirmation techniques. *J Clin*  
328 *Microbiol.* 2011;49(2):519–22.
- 329 6. Tracz DM, Boyd DA, Bryden L, Hizon R, Giercke S, Caesele P V., et al. Increase in ampC  
330 promoter strength due to mutations and deletion of the attenuator in a clinical isolate of  
331 cefoxitin-resistant *Escherichia coli* as determined by RT-PCR. *J Antimicrob Chemother*  
332 [Internet]. 2005;55(5):768–72. Available from:  
333 <https://www.ncbi.nlm.nih.gov/labs/articles/15761065/>
- 334 7. Tracz DM, Boyd DA, Hizon R, Bryce E, McGeer A, Ofner-Agostini M, et al. ampC gene  
335 expression in promoter mutants of cefoxitin-resistant *Escherichia coli* clinical isolates.  
336 *FEMS Microbiol Lett* [Internet]. 2007;270(2):265–71. Available from:  
337 <https://academic.oup.com/femsle/article-lookup/doi/10.1111/j.1574-6968.2007.00672.x>
- 338 8. Martinez L, Simonsen GS. EUCAST detection of resistance mechanisms, version 2.0.  
339 2017;1–43.



- 340 9. Birnbaum J, Stapley EO, Miller AK, Wallick H, Hendlin D, Woodruff HB. Cefoxitin, a semi-  
341 synthetic cephamycin: A microbiological overview. *J Antimicrob Chemother.* 1978;4:15–  
342 32.
- 343 10. Jacoby GA. AmpC B-Lactamases. *Clin Microbiol Rev.* 2009;22(1):161–82.
- 344 11. Peter-Getzlaff S, Polsfuss S, Poledica M, Hombach M, Giger J, Böttger EC, et al. Detection  
345 of AmpC beta-lactamase in *Escherichia coli*: Comparison of three phenotypic confirmation  
346 assays and genetic analysis. *J Clin Microbiol.* 2011;49(8):2924–32.
- 347 12. Ingram PR, Inglis TJJ, Vanzetti TR, Henderson BA, Harnett GB, Murray RJ. Comparison of  
348 methods for AmpC  $\beta$ -lactamase detection in enterobacteriaceae. *J Med Microbiol.*  
349 2011;60:715–21.
- 350 13. Polsfuss S, Bloemberg G V., Giger J, Meyer V, Böttger EC, Hombach M. Practical approach  
351 for reliable detection of AmpC beta-lactamase-producing Enterobacteriaceae. *J Clin*  
352 *Microbiol.* 2011;49(8):2798–803.
- 353 14. Reuland EA, Hays JP, De Jongh DMC, Abdelrehim E, Willemsen I, Kluytmans JAJW, et al.  
354 Detection and occurrence of plasmid-mediated AmpC in highly resistant gram-negative  
355 Rods. *PLoS One.* 2014;9(3).
- 356 15. Kluytmans-Van Den Bergh MFQ, Rossen JWA, Bruijning-Verhagen PCJ, Bonten MJM,  
357 Friedrich AW, Vandenbroucke-Grauls CMJE, et al. Whole-genome multilocus sequence  
358 typing of extended-spectrum-beta-lactamase-producing enterobacteriaceae. *J Clin*  
359 *Microbiol.* 2016;54(12):2919–2927.
- 360 16. Den Drijver E, Verweij JJ, Verhulst C, Oome S, Soer J, Willemsen I, et al. Decline in AmpC  
361  $\beta$ -lactamase-producing *Escherichia coli* in a Dutch teaching hospital (2013-2016). *PLoS*

- 362 One [Internet]. 2018;13(10). Available from:  
363 <https://doi.org/10.1371/journal.pone.0204864>
- 364 17. Dierikx CM, van Duijkeren E, Schoormans AHW, van Essen-Zandbergen A, veldman K, Kant  
365 A, et al. Occurrence and characteristics of extended-spectrum- $\beta$ -lactamase- and AmpC-  
366 producing clinical isolates derived from companion animals and horses. *J Antimicrob*  
367 *Chemother.* 2012;67(6):1368–74.
- 368 18. Dierikx C, van der Goot J, Fabri T, van Essen-Zandbergen A, Smith H, Mevius D. Extended-  
369 spectrum- $\beta$ -lactamase- and AmpC- $\beta$ -lactamase-producing *Escherichia coli* in Dutch  
370 broilers and broiler farmers. *J Antimicrob Chemother.* 2013;68(1):60–7.
- 371 19. Hordijk J, Wagenaar JA, van de Giessen A, Dierikx C, van Essen-Zandbergen A, Veldman K,  
372 et al. Increasing prevalence and diversity of ESBL/AmpC-type  $\beta$ -lactamase genes in  
373 *Escherichia coli* isolated from veal calves from 1997 to 2010. *J Antimicrob Chemother.*  
374 2013;68:1970–3.
- 375 20. Ferdous M, Friedrich AW, Grundmann H, de Boer RF, Croughs PD, Islam MA, Kluytmans-  
376 van den Bergh MF, Kooistra-Smid AM RJ. Molecular characterization and phylogeny of  
377 Shiga toxin–producing *Escherichia coli* isolates obtained from two Dutch regions using  
378 whole genome sequencing. *Clin Microbiol Infect.* 2016;22(7):642.e1-9.
- 379 21. Bauernfeind A, Schneider I, Jungwirth R, Sahly H, Ullmann U. A novel type of AmpC  $\beta$ -  
380 lactamase, ACC-1, produced by a *Klebsiella pneumoniae* strain causing nosocomial  
381 pneumonia. *Antimicrob Agents Chemother.* 1999;43(8):1924–31.
- 382 22. Girlich D, Karim A, Spicq C, Nordmann P. Plasmid-Mediated Cephalosporinase ACC-1 in  
383 Clinical Isolates of *Proteus mirabilis* and *Escherichia coli*. *Eur J Clin Microbiol* [Internet].

- 384 2000;19(11):893–5. Available from: <https://www.researchgate.net/publication/12177801>
- 385 23. Miró E, Mirelis B, Navarro F, Matas L, Giménez M, Rabaza C. Escherichia coli Producing an  
386 ACC-1 Class C  $\beta$ -Lactamase Isolated in Barcelona, Spain. Antimicrob Agents Chemother.  
387 2005;49(2):866–7.
- 388 24. Nadjar D, Rouveau M, Verdet C, Donay JL, Herrmann JL, Lagrange PH, et al. Outbreak of  
389 Klebsiella pneumoniae producing transferable AmpC-type  $\beta$ -lactamase (ACC-1) originating  
390 from Hafnia alvei. FEMS Microbiol Lett. 2000;187(1):35–40.
- 391 25. Willemsen I, Oome S, Verhulst C, Pettersson A, Verduin K, Kluytmans J. Trends in  
392 Extended Spectrum Beta-Lactamase (ESBL) producing enterobacteriaceae and ESBL genes  
393 in a Dutch teaching hospital, measured in 5 yearly point prevalence surveys (2010-2014).  
394 PLoS One. 2015;10(11):e0141765.
- 395 26. Reuland EA, Al Naiemi N, Kaiser AM, Heck M, Kluytmans JAJW, Savelkoul PHM, et al.  
396 Prevalence and risk factors for carriage of ESBL-producing Enterobacteriaceae in  
397 Amsterdam. J Antimicrob Chemother. 2016;71(4):1076–82.
- 398 27. Hoffman-Roberts H, Luepke K, Tabak YP, Mohr J, Johannes RS, Gupta V. National  
399 Prevalence of Extended-Spectrum Beta-lactamase Producing Enterobacteriaceae (ESBL) in  
400 the Ambulatory and Acute Care Settings in the United States in 2015. Open Forum Infect  
401 Dis [Internet]. 2016;3(suppl\_1). Available from: [https://academic.oup.com/ofid/article-](https://academic.oup.com/ofid/article-lookup/doi/10.1093/ofid/ofw172.233)  
402 [lookup/doi/10.1093/ofid/ofw172.233](https://academic.oup.com/ofid/article-lookup/doi/10.1093/ofid/ofw172.233)
- 403 28. Kluytmans-Van Den Bergh MFQ, Verhulst C, Willemsen LE, Verkade E, Bonten MJM,  
404 Kluytmans JAJW. Rectal carriage of extended-spectrum-beta-lactamase-producing  
405 enterobacteriaceae in hospitalized patients: Selective preenrichment increases yield of

- 406 screening. *J Clin Microbiol* [Internet]. 2015;53(8):2709–12. Available from:  
407 <http://jcm.asm.org/content/53/8/2709>
- 408 29. Jazmati N, Hein R, Hamprecht A. Use of an enrichment broth improves detection of  
409 extended-spectrum-beta-lactamase-producing enterobacteriaceae in clinical stool  
410 samples. *J Clin Microbiol*. 2016;54(2):467–70.
- 411 30. Jazmati N, Jazmati T, Hamprecht A. Importance of pre-enrichment for detection of third-  
412 generation cephalosporin-resistant Enterobacteriaceae (3GCREB) from rectal swabs. *Eur J*  
413 *Clin Microbiol Infect Dis*. 2017;36(10):1847–51.
- 414 31. Van Hoek AHAM, Schouls L, Van Santen MG, Florijn A, De Greeff SC, Van Duijkeren E.  
415 Molecular Characteristics of Extended- Spectrum Cephalosporin-Resistant  
416 Enterobacteriaceae from Humans in the Community. *PLoS One*. 2015;10(6):e0129085.
- 417 32. Reuland EA, Halaby T, Hays JP, De Jongh DMC, Snetselaar HDR, Van Keulen M, et al.  
418 Plasmid-mediated AmpC: Prevalence in community-acquired isolates in Amsterdam, the  
419 Netherlands, and risk factors for carriage. *PLoS One* [Internet]. 2015;10(1):1–9. Available  
420 from: <https://www.ncbi.nlm.nih.gov/pmc/articles/PMC4294687/pdf/pone.0113033.pdf>
- 421 33. Martínez-Martínez L. Extended-spectrum  $\beta$ -lactamases and the permeability barrier. Vol.  
422 14, *Clinical Microbiology and Infection*. 2008. p. 82–9.
- 423 34. Livermore DM, Canton R, Gniadkowski M, Nordmann P, Rossolini GM, Arlet G, et al. CTX-  
424 M: Changing the face of ESBLs in Europe. *J Antimicrob Chemother*. 2007;59(2):165–74.
- 425 35. Edquist P, Ringman M, Liljequist BO, Wisell KT, Giske CG. Phenotypic detection of  
426 plasmid-acquired AmpC in *Escherichia coli* - Evaluation of screening criteria and  
427 performance of two commercial methods for the phenotypic confirmation of AmpC

428 production. Eur J Clin Microbiol Infect Dis. 2013;32(9):1205–10.  
429 36. Aarestrup FM, Hasman H, Veldman K, Mevius D. Evaluation of Eight Different  
430 Cephalosporins for Detection of Cephalosporin Resistance in *Salmonella enterica* and  
431 *Escherichia coli*. Microb Drug Resist [Internet]. 2010;16(4):253–61. Available from:  
432 <http://www.liebertonline.com/doi/abs/10.1089/mdr.2010.0036>

433

434

435

436

437

438

439

440

441

442

443

444

445

446

447

448

449

450 TABLE 1 Ability of 159 E. coli isolates to grow on four different AmpC screening agars

451

| <b>Characteristics</b>                         | <b>No. of isolates</b> | <i>Cefotaxime 1 mg/L</i> |                         | <i>Ceftazidime 1 mg/L</i> |                         |
|------------------------------------------------|------------------------|--------------------------|-------------------------|---------------------------|-------------------------|
|                                                |                        | <b>No Cefoxitin</b>      | <b>8 mg/L Cefoxitin</b> | <b>No Cefoxitin</b>       | <b>8 mg/L Cefoxitin</b> |
| <b><i>pAmpC</i> positive and ESBL negative</b> | 40                     | 40 (100%)                | 39 (97.5%)              | 40 (100%)                 | 39 (97.5%)              |
| <i>bla</i> <sub>CMY-2</sub>                    | 31                     | 31 (100%)                | 31 (100%)               | 31 (100%)                 | 31 (100%)               |
| <i>bla</i> <sub>CMY-42</sub>                   | 3                      | 3 (100%)                 | 3 (100%)                | 3 (100%)                  | 3 (100%)                |
| <i>bla</i> <sub>CMY-79</sub>                   | 1                      | 1 (100%)                 | 1 (100%)                | 1 (100%)                  | 1 (100%)                |
| <i>bla</i> <sub>DHA</sub>                      | 2                      | 2 (100%)                 | 2 (100%)                | 2 (100%)                  | 2 (100%)                |
| <i>bla</i> <sub>ACC</sub>                      | 2                      | 2 (100%)                 | 1 (50%)                 | 2 (100%)                  | 1 (50%)                 |
| <i>bla</i> <sub>MOX</sub>                      | 1                      | 1 (100%)                 | 1 (100%)                | 1 (100%)                  | 1 (100%)                |
| <b><i>cAmpC</i> positive and ESBL negative</b> | 40                     | 40 (100%)                | 39 (97.5%)              | 40 (100%)                 | 40 (100%)               |
| <b>ESBL positive and AmpC negative</b>         | 40                     | 40 (100%)                | 17 (42.5%)              | 40 (100%)                 | 15 (37.5%)              |
| <i>bla</i> <sub>CTX-M-1</sub> group            | 28                     | 28 (100%)                | 14 (50%)                | 28 (100%)                 | 14 (50%)                |
| <i>bla</i> <sub>CTX-M-9</sub> group            | 12                     | 12 (100%)                | 3 (25%)                 | 12 (100%)                 | 1 (8.3%)                |
| <b>AmpC negative and ESBL negative</b>         | 39                     | 1 (2.6%)                 | 1(2.6%)                 | 0 (0%)                    | 0 (0%)                  |

452

453

454

455

456

457

458

459

460

461 TABLE 2 Sensitivity (with 95% confidence intervals) of different agars

*Sensitivity of different agars\**

|                                | pAmpC |                     | cAmpC |                     |
|--------------------------------|-------|---------------------|-------|---------------------|
| <i>Cefotaxime</i>              | 40/40 | 1.00<br>(0.92-1.00) | 40/40 | 1.00<br>(0.92-1.00) |
| <i>Cefotaxime + Cefoxitin</i>  | 39/40 | 0.98<br>(0.86-1.00) | 39/40 | 0.98<br>(0.86-1.00) |
| <i>Ceftazidime</i>             | 40/40 | 1.00<br>(0.92-1.00) | 40/40 | 1.00<br>(0.92-1.00) |
| <i>Ceftazidime + Cefoxitin</i> | 39/40 | 0.98<br>(0.86-1.00) | 40/40 | 1.00<br>(0.92-1.00) |

462 \*Sensitivity based on growth on agar (true positive) divided through all isolates of group (true positive + false negative).

463 TABLE 3 Specificity (with 95% confidence intervals) of different agars

464

*Specificity of agars\**

|                                | ESBL-positive isolates |                     | AmpC/ESBL-negative isolates |                     |
|--------------------------------|------------------------|---------------------|-----------------------------|---------------------|
| <i>Cefotaxime</i>              | 0/40                   | 0.00<br>(0.00-0.08) | 38/39                       | 0.97<br>(0.86-1.00) |
| <i>Cefotaxime + Cefoxitin</i>  | 23/40                  | 0.58<br>(0.42-0.72) | 38/39                       | 0.97<br>(0.86-1.00) |
| <i>Ceftazidime</i>             | 0/40                   | 0.00<br>(0.00-0.08) | 39/39                       | 1.00<br>(0.92-1.00) |
| <i>Ceftazidime + Cefoxitin</i> | 25/40                  | 0.63<br>(0.47-0.76) | 39/39                       | 1.00<br>(0.92-1.00) |

465 \*Specificity based on no growth on agar (true negative) divided through all isolates of group (true negative + false positive).

466

467

468

469

470

471

472

473

474 Fig 1. Model of expected specificity of cefotaxime 1mg/L + cefoxitin 8mg/L agar versus ESBL  
475 prevalence (%)

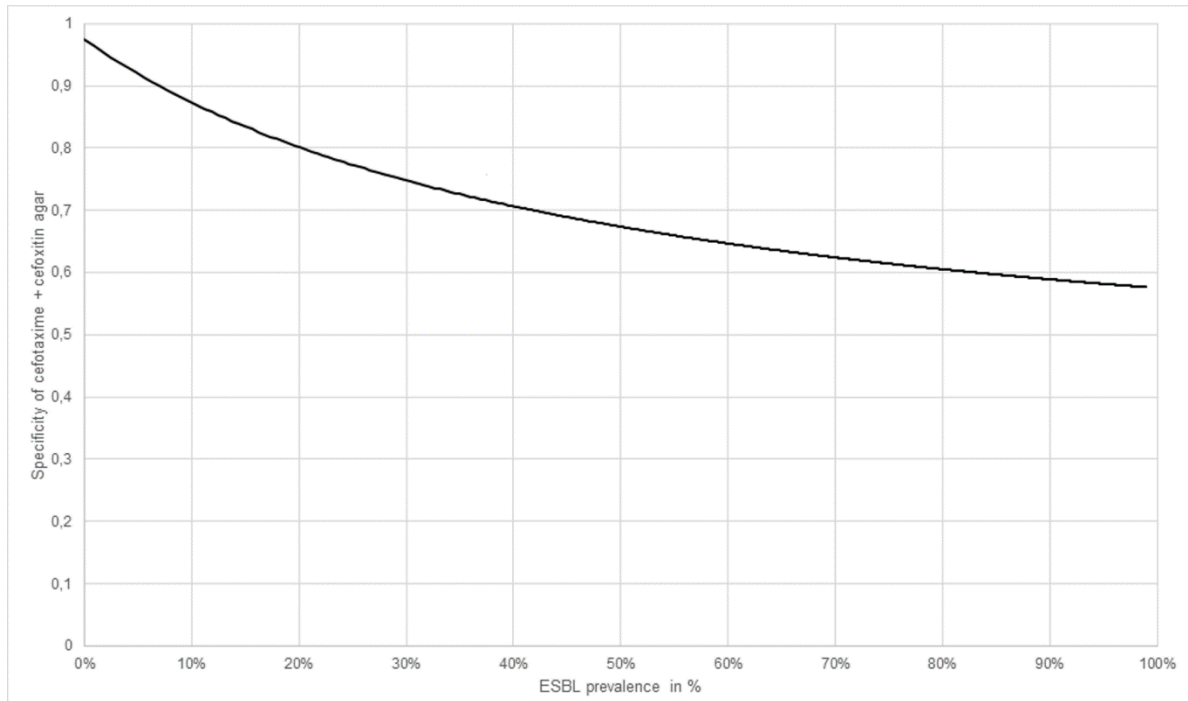

476

477 Fig 2. Model of expected specificity of ceftazidime 1mg/L + cefoxitin 8mg/L agar versus ESBL  
478 prevalence (%).

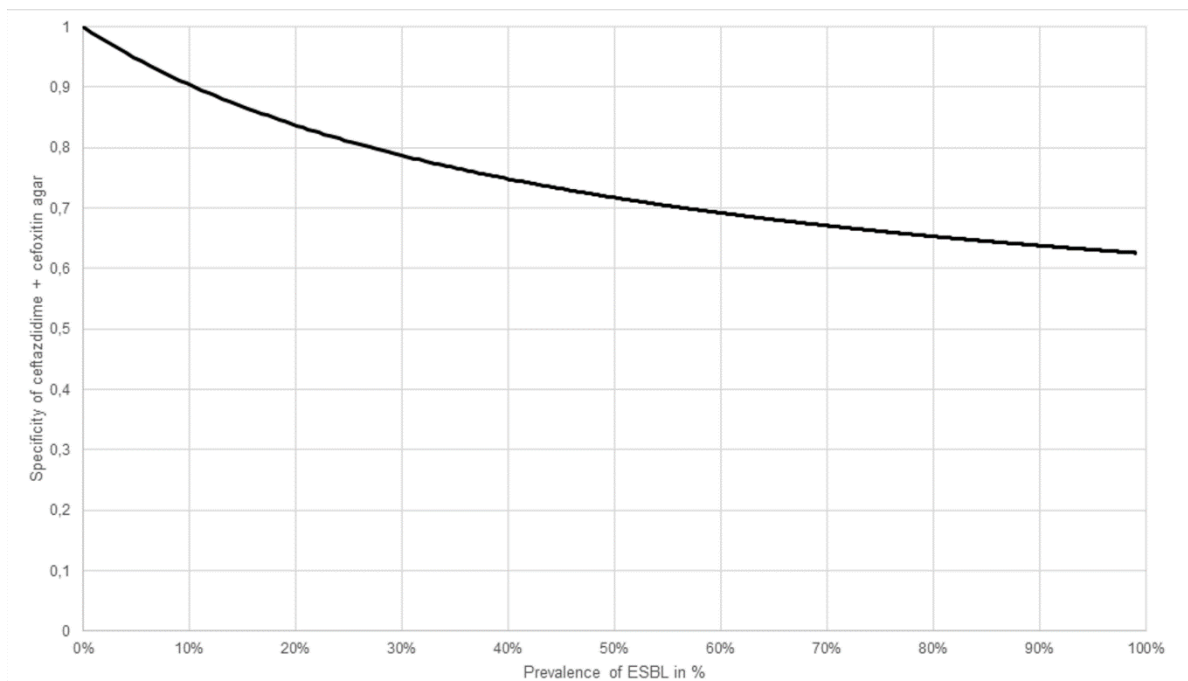

479



480 **Additional files**

481

482 Additional file 1. Detailed supplementary “Materials and Methods”

483

484 Additional file 2. Overview of the panel of *E.coli* strains with origin, sequence methode, acquired  $\beta$ -

485 lactamases, MLST typing and alterations in promoter and attenuator region
